# Supplementary material for: An efficient ratiometric fluorescence and colorimetric dual-mode probe for convenient determination of nitrite in real samples and E. coli
Source: Royal Society of Chemistry journal article supplement (doi:10.1039/d4ay00417e), 2024-01-01
Supplement: d4ay00417e1.pdf [file d4ay00417e1.pdf]

## Electronic Supplementary Material

### **An efficient ratiometric fluorescence and colorimetry dual-mode probe for convenient determination of nitrite in real samples and *E. coli***

Yujie Wen<sup>a,b</sup>, Cong Tang<sup>b</sup>, Qing Shen<sup>b</sup>, Shuqing Dong<sup>a</sup>, Yaya Wang<sup>a,\*</sup>, Yunchun Li<sup>a</sup>, Shijun Shao<sup>a,\*</sup>

<sup>a</sup> CAS Key Laboratory of Chemistry of Northwestern Plant Resources and Key Laboratory for Natural Medicine of Gansu Province, Lanzhou Institute of Chemical Physics, Chinese Academy of Sciences, Lanzhou 730000, PR China

<sup>b</sup> University of Chinese Academy of Sciences, Chinese Academy of Sciences, Beijing 100049, PR China

\*Corresponding Author: Shijun Shao

Tel: +86-931-4968209

Fax: +86-931-4968209

Email: [sjshao@licp.cas.cn](mailto:sjshao@licp.cas.cn)

### Table of Contents

|                                                                               |    |
|-------------------------------------------------------------------------------|----|
| 1. Fluorescent probes for the detection of NO <sub>2</sub> <sup>-</sup> ..... | 2  |
| 2. Synthesis procedures .....                                                 | 3  |
| 3. HRMS and NMR spectra .....                                                 | 4  |
| 4. Validation of the reaction mechanism.....                                  | 8  |
| 5. Optimization of response conditions.....                                   | 9  |
| 6. Specificity of TMN-NH <sub>2</sub> .....                                   | 10 |
| 7. Detection of NO <sub>2</sub> <sup>-</sup> in real samples .....            | 11 |

# 1. Fluorescent probes for the detection of NO<sub>2</sub><sup>-</sup>

**Table S1.** Comparison of fluorescent probes for the detection of NO<sub>2</sub><sup>-</sup>.

| reaction mechanism                                                                        | Probes                                                                              | Excitation/<br>Emission<br>wavelength<br>/nm | Stokes<br>shift<br>/nm | reaction<br>temperature<br>/ °C | response<br>time / min | Signal<br>transduction<br>mode | References                                     |
|-------------------------------------------------------------------------------------------|-------------------------------------------------------------------------------------|----------------------------------------------|------------------------|---------------------------------|------------------------|--------------------------------|------------------------------------------------|
| Diazotization<br>of amines                                                                | 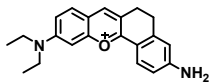   | 580/620                                      | 40                     | 25                              | 8                      | “turn-off”                     | Spectrochim. Acta<br>A., 2022, 282,<br>121692  |
|                                                                                           |    | 465/580                                      | 115                    | 25                              | 40                     | “turn-off”                     | Microchem. J.,<br>2021, 169, 106342            |
| Amino<br>diazotization<br>followed by<br>azo coupling<br>with activated<br>aromatic rings |    | -/463<br>365/530                             | -<br>165               | -                               | < 5S                   | ratiometric                    | Adv. Sci., 2020, 7,<br>2002991.                |
|                                                                                           |   | 285/400<br>470/555                           | 115<br>85              | room<br>temperature             | 1                      | ratiometric                    | Anal. Chem., 2014,<br>87, 1274-1280            |
|                                                                                           |  | 355/440                                      | 85                     | room<br>temperature             | 7                      | “turn-on”                      | Anal. Chim. Acta,<br>2023, 1268, 341403        |
|                                                                                           |  | 567/656                                      | 89                     | room<br>temperature             | 7                      | “turn-on”                      | Food Chem., 2021,<br>341, 128254               |
| Amino<br>diazotization<br>followed by<br>hydrolysis to<br>hydroxyl                        |  | 285/350                                      | 65                     | -                               | 10                     | “turn-off”                     | Microchem. J.,<br>1999, 62, 371-376            |
|                                                                                           |  | 346/403                                      | 57                     | in boiling<br>water bath        | 20                     | “turn-off”                     | Spectrochim. Acta<br>A., 2007, 66, 586-<br>589 |
|                                                                                           |  | 325/380                                      | 55                     | in boiling<br>water bath        | 70                     | -                              | Chromatographia<br>1993, 36, 57-60.            |
|                                                                                           |  | 340/435                                      | 95                     | room<br>temperature             | 10                     | “turn-off”                     | New J. Chem.,<br>2017, 41, 7171-<br>7176       |
|                                                                                           |  | 400/597<br>400/663                           | 197<br>263             | room<br>temperature             | 10                     | ratiometric                    | This work                                      |

## 2. Synthesis procedures

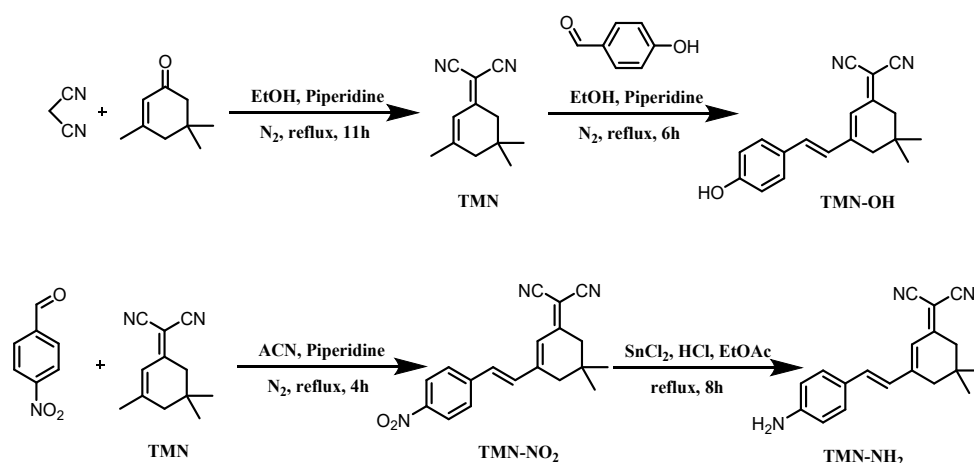

**Scheme S1.** Synthetic scheme of fluorophore **TMN-OH** and probe **TMN-NH<sub>2</sub>**

TMN (2-(3,5,5-trimethylcyclohex-2-en-1-ylidene)malononitrile) and TMN-NO<sub>2</sub> ((*E*)-2-(3-(4-nitrostyryl)-5,5-dimethylcyclohex-2-en-1-ylidene)malononitrile) were prepared as described in the literature [1]

**Synthesis of TMN-NH<sub>2</sub>** ((*E*)-2-(3-(4-aminostyryl)-5,5-dimethylcyclohex-2-en-1-ylidene)malononitrile): TMN-NO<sub>2</sub> (802 mg, 2.5 mmol) and SnCl<sub>2</sub>·2H<sub>2</sub>O (565 mg, 2.5 mmol) were mixed in 30 mL ethyl acetate, then hydrochloric acid (0.5 mL) was slowly added to the above solution. The mixture was refluxed at 80 °C for 8 h until the reaction was completed. The mixture was adjusted pH to neutral with 15% sodium hydroxide, and then extracted with dichloromethane. The organic phase was dried over Na<sub>2</sub>SO<sub>4</sub>, filtered, concentrated in vacuo and the crude product was purified by silica column chromatography using petroleum ether/dichloromethane (5:1, v/v) as eluent to afford **TMN-NH<sub>2</sub>** as black-purple powder (586 mg, yield: 81.1%). <sup>1</sup>H NMR (400 MHz, DMSO-*d*<sub>6</sub>) δ 7.41 (d, *J* = 8.5 Hz, 2H), 7.18 (d, *J* = 15.9 Hz, 1H), 7.04 (d, *J* = 15.9 Hz, 1H), 6.70 (s, 1H), 6.56 (d, *J* = 8.5 Hz, 2H), 5.87 (s, 2H), 2.56 (s, 2H), 1.00 (s, 6H). <sup>13</sup>C NMR (100 MHz, DMSO-*d*<sub>6</sub>) δ 169.90 (s), 157.61 (d, *J* = 5.8 Hz, 1H), 151.38 (s), 139.85 (s), 130.18 (s, 2C), 123.42 (d, *J* = 8.4 Hz), 119.95 (s), 114.58 (s), 113.78 (s, 2C), 72.66 (s), 42.31 (s), 38.21 (s), 31.64 (s), 27.46 (s, 2C). ESI-Mass: calcd for C<sub>19</sub>H<sub>19</sub>N<sub>3</sub>: 289.1579, found [M-H]<sup>-</sup> at m/z 288.1523. (Fig. S1 - S3).

**Synthesis of TMN-OH** (*(E)*-2-(3-(4-hydroxystyryl)-5,5-dimethylcyclohex-2-en-1-ylidene)malononitrile): TMN (93 mg, 0.5 mmol), *p*-hydroxybenzaldehyde (122 mg, 1.0 mmol) and some piperidine were added in 20 mL EtOH. The mixture was refluxed at 80 °C for 6 h with stirring under a nitrogen atmosphere. After being cooled to room temperature, the solvent was removed under reduced pressure and the residue was purified by column chromatography (PE/EA, 3/1, v/v, as eluent) to afford the desire product as a yellow solid (135 mg, yield 93.1%). <sup>1</sup>H NMR (400 MHz, DMSO-*d*<sub>6</sub>) δ 9.97 (s, 1H), 7.55 (d, *J* = 8.5 Hz, 2H), 7.21 (d, *J* = 5.0 Hz, 2H), 6.81 – 6.77 (m, 3H), 2.59 (s, 2H), 2.52 (s, 2H), 1.01 (s, 6H). <sup>13</sup>C NMR (100 MHz, DMSO-*d*<sub>6</sub>) δ 170.23 (s), 159.29 (s), 156.67 (s), 138.25 (s), 129.82 (s, 2C), 127.09 (s), 126.22 (s), 121.32 (s), 115.83 (s, 2C), 114.07 (s), 113.26 (s), 74.76 (s), 42.29 (s), 38.18 (s), 31.61 (s), 27.39 (s, 2C). ESI-Mass: calcd for C<sub>19</sub>H<sub>18</sub>N<sub>2</sub>O: 290.1419, found [M-H]<sup>-</sup> at *m/z* 289.1342. (Fig. S4 - S6)

### 3. HRMS and NMR spectra

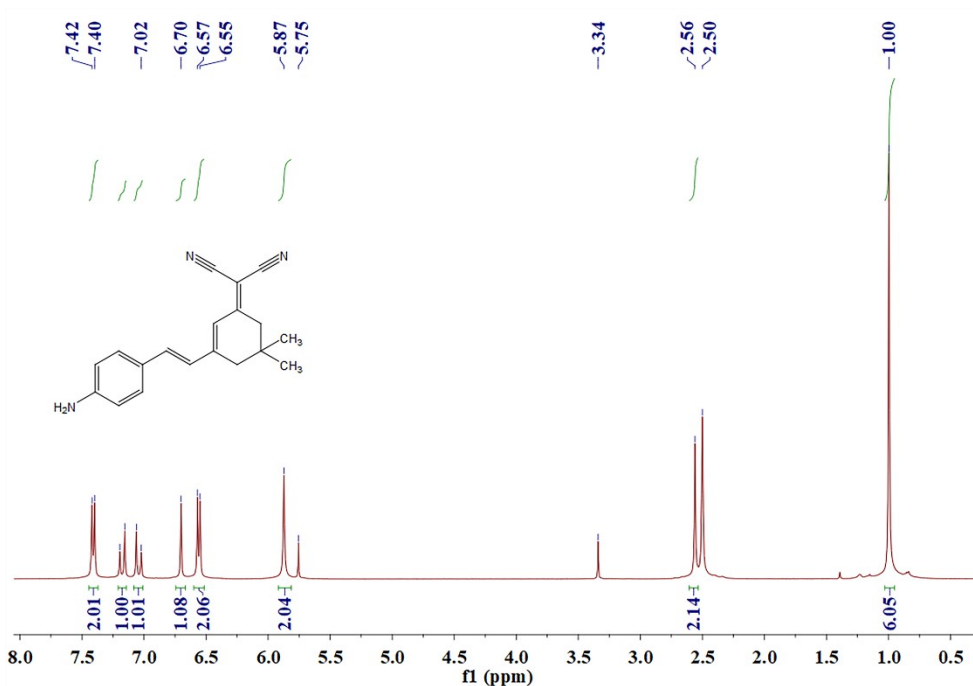

**Fig. S1** <sup>1</sup>H NMR of TMN-NH<sub>2</sub> in DMSO-*d*<sub>6</sub>

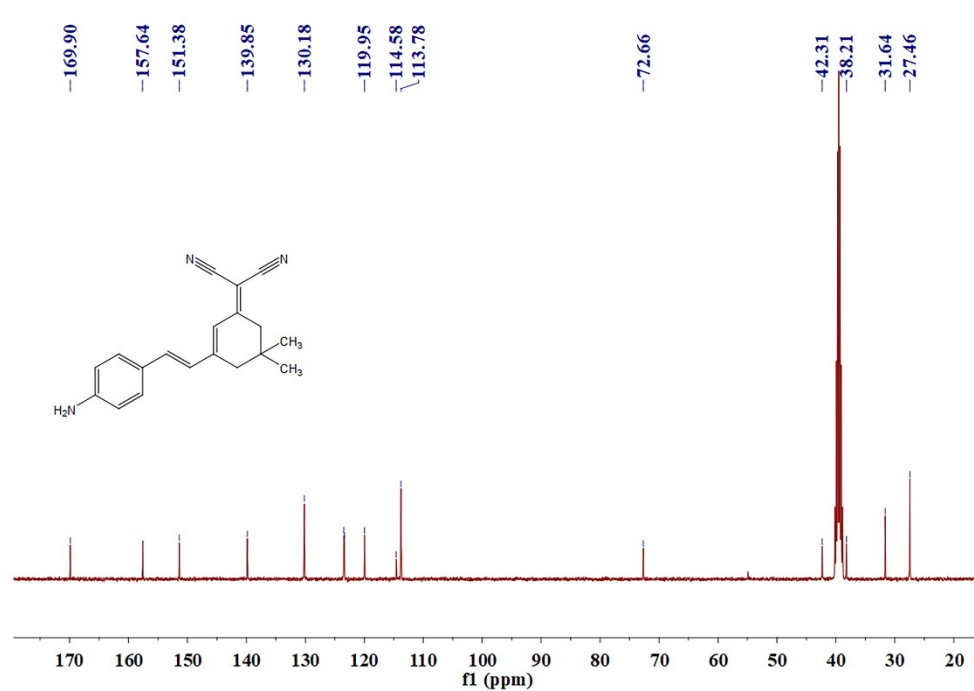

Fig. S2  $^{13}\text{C}$  NMR of TMN-NH<sub>2</sub> in DMSO-*d*<sub>6</sub>

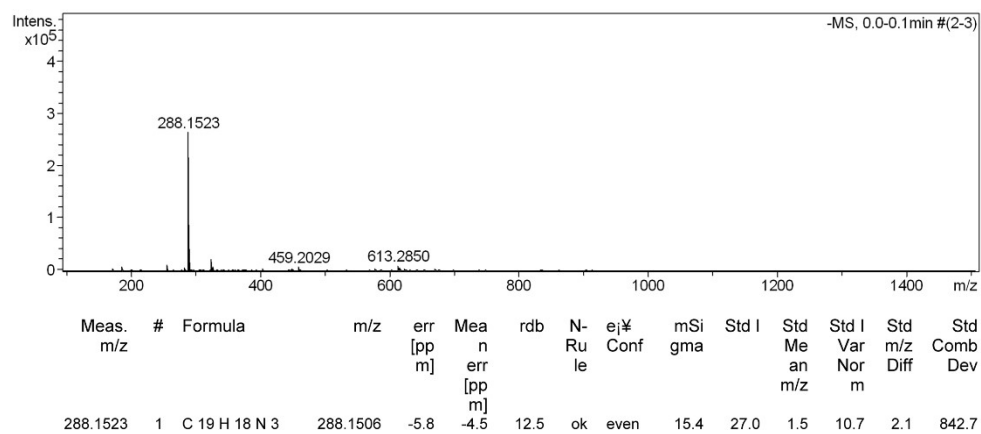

Fig. S3  $^1\text{H}$  NMR of HBTMS in DMSO-*d*<sub>6</sub>

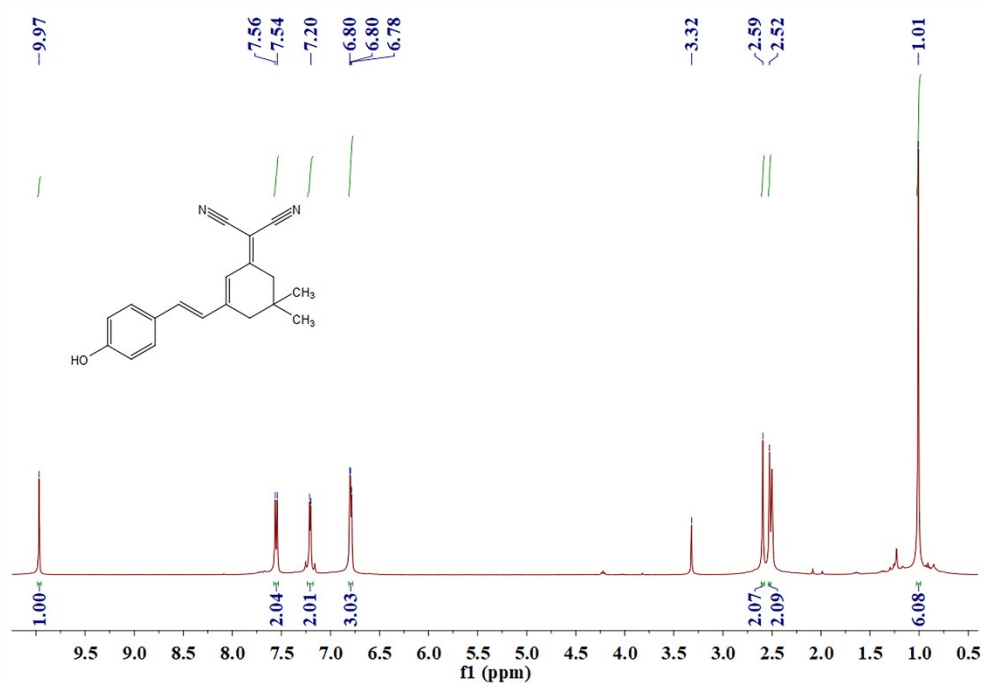

Fig. S4 <sup>1</sup>H NMR of TMN-OH in DMSO-*d*<sub>6</sub>

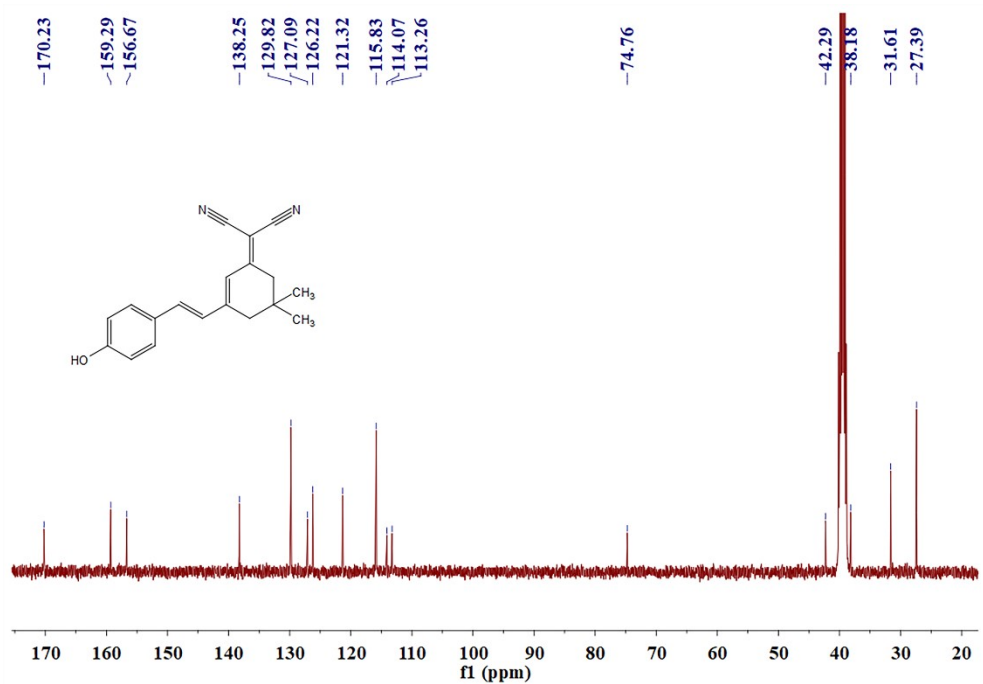

Fig. S5 <sup>13</sup>C NMR of TMN-OH in DMSO-*d*<sub>6</sub>

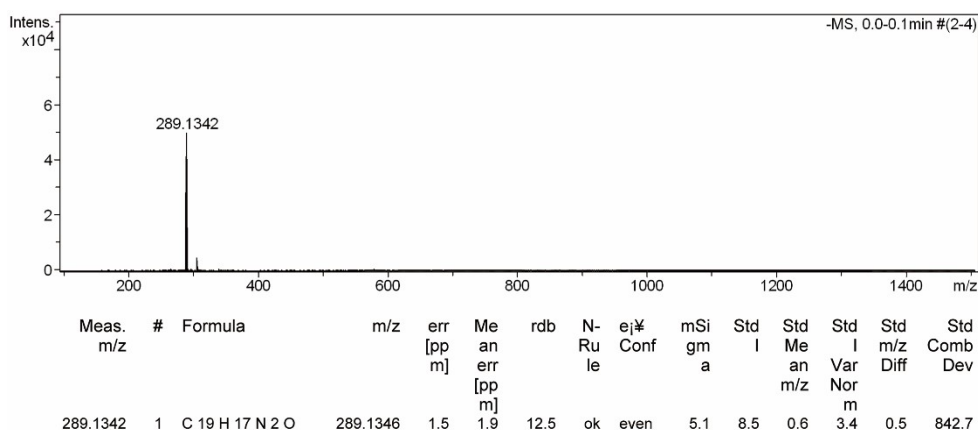

Fig. S6 ESI-HRMS [M-H] of TMN-OH

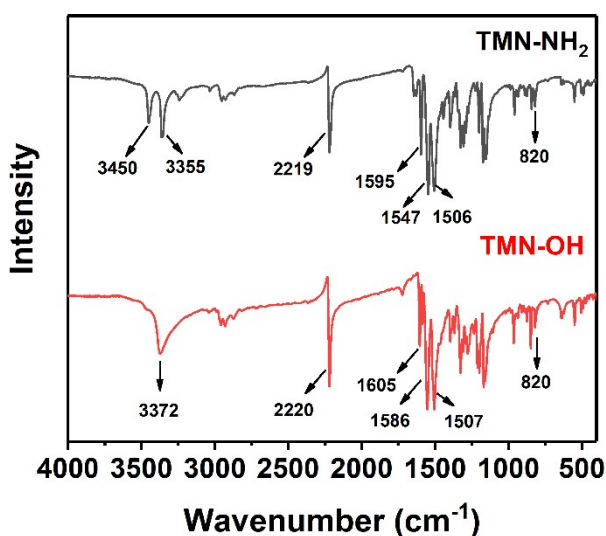

Fig. S7 FTIR spectra of TMN-NH<sub>2</sub> and TMN-OH

The infrared spectra were evaluated to verify the structures of TMN-NH<sub>2</sub> and TMN-OH in Fig. S7. In the infrared spectra of TMN-NH<sub>2</sub>, the peaks at 1506, 1547 and 1595 cm<sup>-1</sup> demonstrated a benzene structure. The band at 820 cm<sup>-1</sup> was caused by the out-of-plane bending vibrational mode of C-H, indicating that there was 1,4-disubstituted benzene in TMN-NH<sub>2</sub>. The absorption band at 2219 cm<sup>-1</sup> in TMN-NH<sub>2</sub> correspond to the stretching vibration of C≡N bands. The peaks at 3355 and 3450 cm<sup>-1</sup> were assigned to the characteristic peak of N-H bond of primary amines. The infrared spectrum of TMN-OH has similar characteristic peaks to that of TMN-NH<sub>2</sub> in the wavenumber range of 3000-400 cm<sup>-1</sup>, but there was a characteristic peak of the O-H stretching vibration with a broad absorption at 3372 cm<sup>-1</sup>. The above infrared data further validated the structure of TMN-NH<sub>2</sub> and TMN-OH.

## 4. Validation of the reaction mechanism

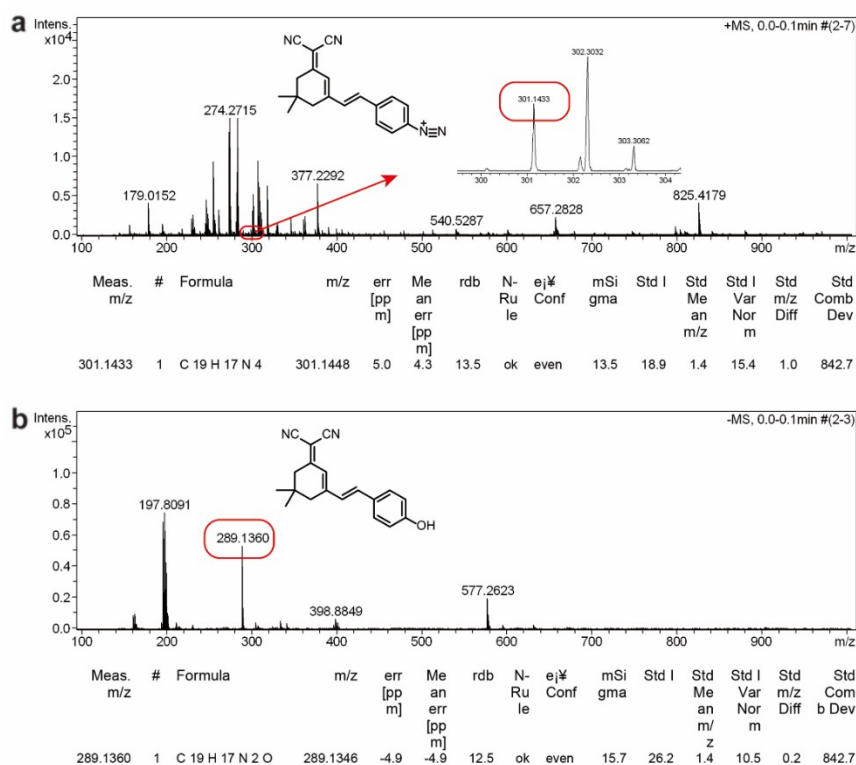

**Fig. S8** ESI-HRMS analysis of the reaction solution of probe **TMN-NH<sub>2</sub>** (10  $\mu$ M) with **NO<sub>2</sub><sup>-</sup>** (20  $\mu$ M) in positive ion mode (a) and in negative ion mode (b).

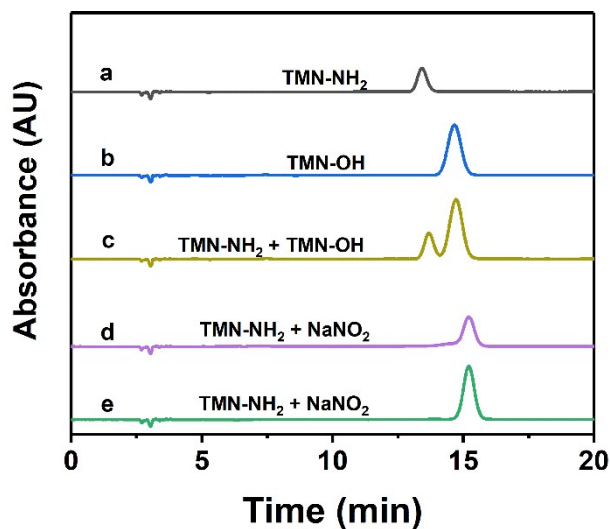

**Fig. S9** HPLC analysis chromatograms. (a) **TMN-NH<sub>2</sub>**; (b) **TMN-OH** (c) the mixture of **TMN-NH<sub>2</sub>** and **TMN-OH**; (d) and (e) were the reaction system of 40  $\mu$ M probe **TMN-NH<sub>2</sub>** with 80  $\mu$ M **NO<sub>2</sub><sup>-</sup>** for 5 min and 10 min, respectively; Chromatographic column: ECHWAY JADE-PAK C18 II (4.6 $\times$ 250 mm, 5  $\mu$ m); Mobile phase: CH<sub>3</sub>OH-H<sub>2</sub>O, 70:30 (v/v); Detection: UV-vis detector (400 nm); Flow rate: 1 mL/min; 20  $^{\circ}$ C; Injection volume: 20  $\mu$ L. Chromatographic retention time: **TMN-NH<sub>2</sub>** 13.6 min, **TMN-OH** 15.2 min.



## 5. Optimization of response conditions

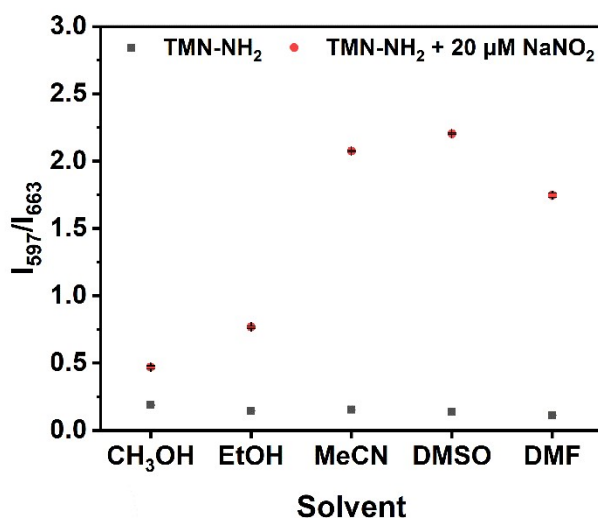

**Fig. S10** The effect of various organic solvent on the  $I_{597}/I_{663}$  of  $\text{TMN-NH}_2$  in the absence and presence of  $\text{NO}_2^-$  (20  $\mu\text{M}$ ). In organic solvent / $\text{H}_2\text{O}$  solution ( $v/v$ , 3:7, pH 1.0),  $\lambda_{\text{ex}} = 400$  nm.

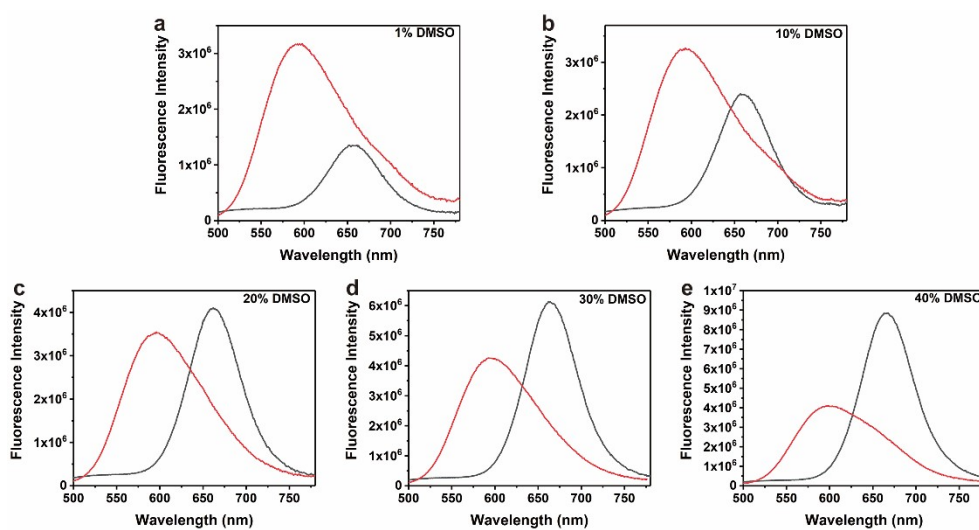

**Fig. S11** The influence of the proportion of DMSO on emission intensity. (a) 1% DMSO, (b) 10% DMSO, (c) 20% DMSO, (d) 30% DMSO, (e) 40% DMSO. Black line:  $\text{TMN-NH}_2$  (10  $\mu\text{M}$ ); red line:  $\text{TMN-NH}_2$  (10  $\mu\text{M}$ ) +  $\text{NO}_2^-$  (20  $\mu\text{M}$ ).  $\lambda_{\text{ex}} = 400$  nm.

## 6. Specificity of TMN-NH<sub>2</sub>

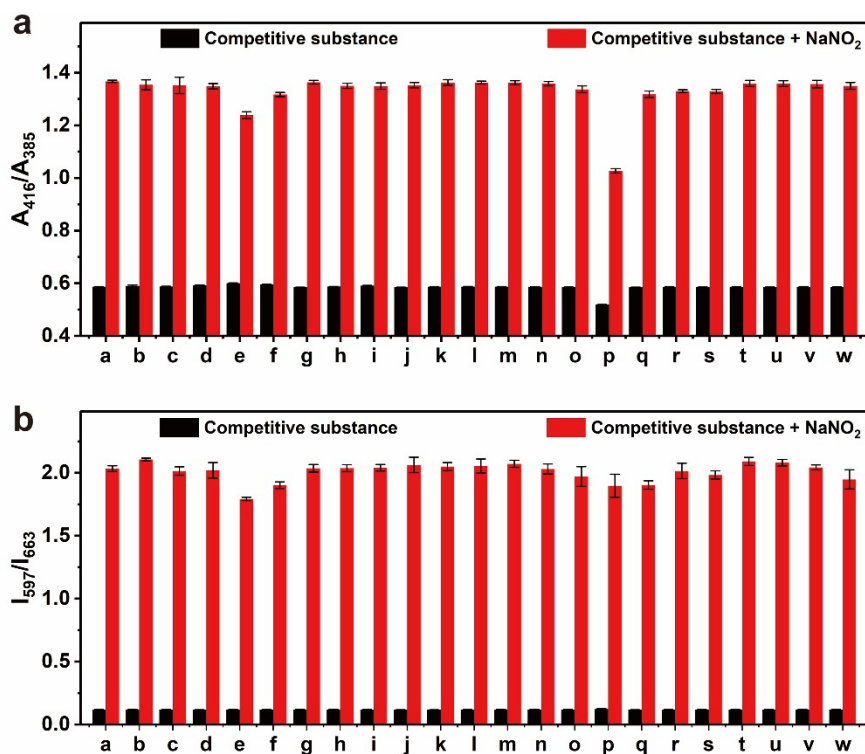

**Fig. S12** (a) Absorbance ratio ( $A_{416}/A_{385}$ ) and (b) fluorescence intensity ratio ( $I_{597}/I_{663}$ ) of TMN-NH<sub>2</sub> (10  $\mu$ M) with various interferents (100  $\mu$ M) in the absence and presence of NO<sub>2</sub><sup>-</sup> (10  $\mu$ M). Tested interferents: (a) blank, (b) KF, (c) CaCl<sub>2</sub>, (d) KBr, (e) KI, (f) MgSO<sub>4</sub>, (g) Na<sub>2</sub>SO<sub>3</sub>, (h) Na<sub>2</sub>S, (i) Na<sub>2</sub>HPO<sub>4</sub>, (j) KH<sub>2</sub>PO<sub>4</sub>, (k) K<sub>2</sub>CO<sub>3</sub>, (l) NaHCO<sub>3</sub>, (m) Zn(NO<sub>3</sub>)<sub>2</sub>, (n) CH<sub>3</sub>COONa, (o) Al(NO<sub>3</sub>)<sub>3</sub>, (p) FeCl<sub>3</sub>, (q) Cu(NO<sub>3</sub>)<sub>2</sub>, (r) Leu, (s) Phe, (t) Glu, (u) Lys, (v) Thr, (w) Val. In DMSO/H<sub>2</sub>O solution ( $v/v$ , 3:7, pH 1.0),  $\lambda_{ex}$  = 400 nm.

## 7. Detection of $\text{NO}_2^-$ in real samples

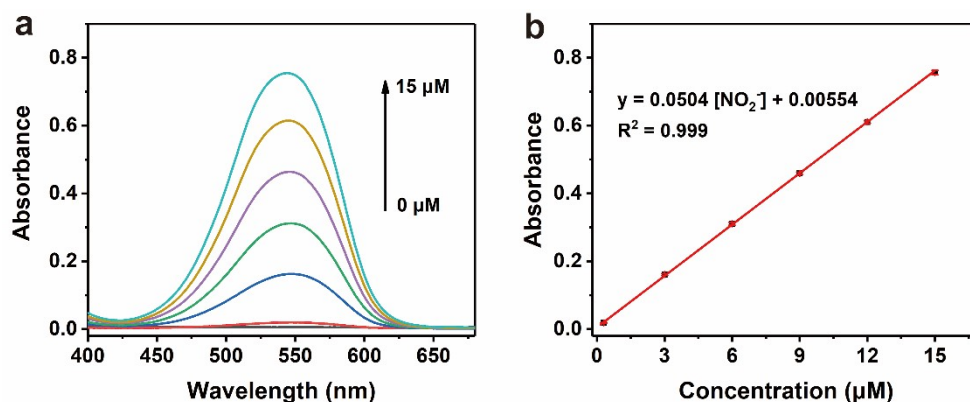

**Fig. S13** Absorption spectra (a) and the calibration plot (b) of the absorbance intensity versus the concentration of  $\text{NO}_2^-$  by the Griess assay.

Different volumes (0, 1.5, 15, 30, 45, 60 and 75  $\mu\text{L}$ ) of  $\text{NO}_2^-$  standard solution (1 mM) and 2 mL of water mixed with 2 mL p-aminobenzene sulfonic acid solution (4 mg  $\text{mL}^{-1}$ ) in 10 mL centrifuge tube respectively. After standing for 5 min, 1 mL naphthalene ethylenediamine hydrochloride (2 mg  $\text{mL}^{-1}$ ) solution were added and leave for 15 min. The absorption spectra were obtained in the range from 400 nm to 680 nm. The procedure for  $\text{NO}_2^-$  detection of real sample extracts (0.5 mL) is the same as above.

**Table S2** Determination of  $\text{NO}_2^-$  in water samples using Griess Assay and **TMN-NH<sub>2</sub>** by ultraviolet spectrophotometry

| Sample                    | Griess Assay<br>( $\mu\text{M}$ ) | This method<br>( $\mu\text{M}$ ) | Add<br>( $\mu\text{M}$ ) | Funded<br>( $\mu\text{M}$ ) | Recovery<br>(%) | RSD<br>(n = 9, %) |
|---------------------------|-----------------------------------|----------------------------------|--------------------------|-----------------------------|-----------------|-------------------|
| natural<br>drinking water |                                   |                                  | 0.50                     | 0.52                        | 103.3           | 2.16              |
|                           | Not detected                      | Not detected                     | 0.75                     | 0.74                        | 98.1            | 2.37              |
|                           |                                   |                                  | 1.00                     | 1.06                        | 106.2           | 1.87              |
| Tap water                 |                                   |                                  | 0.50                     | 0.49                        | 97.6            | 2.86              |
|                           | Not detected                      | Not detected                     | 0.75                     | 0.70                        | 93.9            | 3.06              |
|                           |                                   |                                  | 1.00                     | 0.96                        | 96.3            | 2.32              |

### Reference:

[1] D. Shen, W. Jin, Y. Bai, Y. Huang, H. Lyu, L. Zeng, M. Wang, Y. Tang, W. Wan, X. Dong, Z.

Gao, H.L. Piao, X. Liu, Y. Liu, Rational Design of Crystallization-Induced-Emission Probes To Detect Amorphous Protein Aggregation in Live Cells, *Angew. Chem. Int. Ed.* 60 (2021) 16067-16076. <https://doi.org/10.1002/anie.202103674>.
